# Supplementary material for: Novel Isoprene-Degrading Proteobacteria From Soil and Leaves Identified by Cultivation and Metagenomics Analysis of Stable Isotope Probing Experiments
Source: PubMed Central journal article supplement (PMC6908491; doi:10.3389/fmicb.2019.02700), 2019-12-06
Supplement: Presentation_1.pdf [file Presentation_1.pdf]

**Table S1. Incorporation of <sup>13</sup>C-labelled carbon during DNA-SIP experiments with willow soil**

| <b>Length of Enrichment</b>   | <b><sup>13</sup>C incorporation (μmol g<sup>-1</sup> *)</b> | <b>Time (h)</b> |
|-------------------------------|-------------------------------------------------------------|-----------------|
| Un-enriched (T <sub>0</sub> ) | 0                                                           | 0               |
| Day 6 (T <sub>1</sub> )       | 22.3                                                        | 138             |
| Day 7 (T <sub>2</sub> )       | 47.3                                                        | 172.5           |

\* Consumption of isoprene in DNA-SIP microcosms was monitored by gas chromatography. Incorporation of carbon was estimated assuming that 50% isoprene consumed was assimilated.

**Table S2. Identity of Iso polypeptides encoded by *iso* gene clusters when compared to the corresponding Iso polypeptides from *Rhodococcus* sp. strain AD45**

Isoprene-degrading isolates are in bold. wsMG designations indicate *iso* gene-containing contigs retrieved from willow soil metagenomes. Percentage identities (% amino acid identity) are with respect to the Iso polypeptides of the most well-characterised isoprene-degrader *Rhodococcus* sp. AD45 (Crombie et al., 2015).

|        |       |       |       |       |       |
|--------|-------|-------|-------|-------|-------|
| 100-90 | 89-80 | 79-70 | 69-60 | 59-50 | 49-35 |
|--------|-------|-------|-------|-------|-------|

| Isolate/contig                               | IsoG | IsoH | IsoI | IsoJ | -             | IsoA | IsoB | IsoC | IsoD | IsoE | IsoF | AldH_1 |
|----------------------------------------------|------|------|------|------|---------------|------|------|------|------|------|------|--------|
| <b><i>Rhodococcus</i> sp. AD45</b>           |      |      |      |      |               |      |      |      |      |      |      |        |
| <b><i>Rhodococcus</i> sp. strain WS3</b>     | 100  | 100  | 99   | 100  | -             | 100  | 100  | 100  | 100  | 100  | 100  | 100    |
| <b><i>Rhodococcus</i> sp. strain WS7</b>     | 90   | 88   | 86   | 77   | <b>AldH_2</b> | 91   | 77   | 82   | 94   | 83   | 77   | 74     |
| <b><i>Rhodococcus</i> sp. strain WS4</b>     | 91   | 88   | 86   | 80   | 94            | 90   | 84   | 87   | 96   | 83   | 81   | 77     |
| wsMG6 <i>Rhodococcus</i> -like <i>isoA</i>   | -    | -    | -    | -    | -             | 91   | 84   | 86   | 95   | 84   | 81   | -      |
| wsMG10 <i>Nocardioides</i> -like <i>isoA</i> | -    | 73   | 66   | 66   | 63            | 84   | -    | -    | -    | -    | -    | -      |
| wsMG7 <i>Nocardioides</i> -like <i>isoA</i>  | -    | -    | 73   | 70   | 67            | 85   | 56   | 66   | 68   | 66   | 53   | -      |
| wsMG4 <i>Sphingopyxis</i> -like <i>isoA</i>  | -    | -    | -    | 57   | 51            | 72   | 44   | 50   | 56   | 51   | 42   | -      |
| <b><i>Variovorax</i> sp. strain WS11</b>     | 60   | 48   | 48   | 55   | 52            | 73   | 38   | 40   | 58   | 53   | 41   | -      |
| <b><i>Ramlibacter</i> sp. strain WS9</b>     | 61   | 47   | 47   | 55   | 50            | 71   | 50   | 55   | 55   | 53   | 43   | -      |
| wsMG2 <i>Ramlibacter</i> -like <i>isoA</i>   | 63   | 49   | 49   | 55   | 50            | 71   | -    | -    | -    | -    | -    | -      |
| wsMG3 <i>Ramlibacter</i> -like <i>isoA</i>   | 62   | 49   | 49   | 52   | 53            | 70   | 49   | 55   | 54   | 53   | -    | -      |

Percentages are rounded to the nearest whole number, except that all values in the range 99 – 100 are shown as 99.

**Table S3. Quality assessment and taxonomic assignment of genomic bins reconstructed from metagenome sequence data obtained with <sup>13</sup>C-labelled heavy DNA from DNA-SIP experiments.**

Data provided for bins with *isoA*-containing contigs, having more than 10% completeness, and less than 10% contamination, as determined using MiGA (Rodriguez-R et al., 2018). NA, Not assigned.

| Bin ID | Taxonomy                |                                       | Completeness (%) | Contamination (%) | Strain heterogeneity | Size (Mbp) | % mol GC | wsMG <i>isoA</i> -containing contig |
|--------|-------------------------|---------------------------------------|------------------|-------------------|----------------------|------------|----------|-------------------------------------|
|        | Order                   | Family (Species)                      |                  |                   |                      |            |          |                                     |
| 23     | <i>Actinomycetales</i>  | <i>Nocardiaceae (R. erythropolis)</i> | 73               | 2                 | 40                   | 5.99       | 61.6     | 5 and 8                             |
| 21     | <i>Sphingomonadales</i> | NA                                    | 49               | 0                 | 0                    | 1.94       | 62.2     | 4                                   |
| 13     | <i>Burkholderiales</i>  | NA                                    | 38               | 9                 | 12.12                | 2.79       | 68.9     | 2                                   |
| 4      | <i>Burkholderiales</i>  | <i>Comamonadaceae</i>                 | 30               | 2                 | 0                    | 4.30       | 65.3     | 1                                   |
| 11     | <i>Burkholderiales</i>  | <i>Comamonadaceae</i>                 | 11               | 0                 | 0                    | 7.16       | 60.8     | 3                                   |

**Table S4. Isoprene-degrading bacteria isolated during this study.**

Isolates were obtained from enrichments using soil and leaves from isoprene-emitting trees. Isolates obtained from the DNA-SIP experiment with soil from the vicinity of a willow tree are indicated in bold. Taxonomic classification and p-value for isolates sequenced in this study were determined with the MiGA webserver (Rodriguez-R et al., 2018). Refer to Supplementary Table 5 for sampling dates and exact location of the isoprene-emitting trees. WS: willow soil, WL: willow leaves, OPL: oil palm leaves.

| Isolate                                  | Environment                        | Taxonomic classification (p-value)*     |
|------------------------------------------|------------------------------------|-----------------------------------------|
| <i>Rhodococcus</i> sp. strain WS1        | WS (Colney, UK)                    |                                         |
| <i>Rhodococcus</i> sp. strain WS2        | WS (Colney, UK)                    |                                         |
| <i>Rhodococcus</i> sp. strain WS3        | WS (Colney, UK)                    | <i>Rhodococcus</i> sp.                  |
| <b><i>Rhodococcus</i> sp. strain WS4</b> | <b>WS SIP (Colney, UK)</b>         | <i>Rhodococcus opacus</i> (0.05)        |
| <b><i>Rhodococcus</i> sp. strain WS5</b> | <b>WS SIP (Colney, UK)</b>         |                                         |
| <b><i>Rhodococcus</i> sp. strain WS6</b> | <b>WS SIP (Colney, UK)</b>         |                                         |
| <b><i>Rhodococcus</i> sp. strain WS7</b> | <b>WS SIP (Colney, UK)</b>         | <i>Rhodococcus erythropolis</i> (0.001) |
| <b><i>Rhodococcus</i> sp. strain WS8</b> | <b>WS SIP (Colney, UK)</b>         |                                         |
| <b><i>Ramlibacter</i> sp. strain WS9</b> | <b>WS SIP (Colney, UK)</b>         | <i>Ramlibacter</i> sp.                  |
| <i>Rhodococcus</i> sp. strain WS10       | WS (Colney, UK)                    |                                         |
| <i>Variovorax</i> sp. strain WS11        | WS (University of East Anglia, UK) | <i>Variovorax</i> sp.                   |
| <i>Nocardioides</i> sp. strain WS12      | WS (University of East Anglia, UK) |                                         |
| <i>Variovorax</i> sp. strain WS13        | WS (University of East Anglia, UK) |                                         |
| <i>Rhodococcus</i> sp. strain WL1        | WL (University of East Anglia, UK) |                                         |
| <i>Rhodococcus</i> sp. strain OPL1       | OPL (London, UK)                   |                                         |
| <i>Gordonia</i> sp. strain OPL2          | OPL (London, UK)                   | <i>Gordonia</i> sp.                     |
| <i>Sphingopyxis</i> sp. strain OPL5      | OPL (London, UK)                   |                                         |

\*p-values indicate the probability of incorrect taxonomic ranking at that level (Rodriguez-R et al., 2018).

**Table S5. Location of environmental samples used during this study.**

The table includes the dates at which soil and leaf samples were taken and a short description of the experiments carried out with each. The sample used for DNA-SIP enrichments is shown in bold.

| <b>Sample</b>           | <b>Location</b>                         | <b>Coordinates</b>                  | <b>Dates</b>                    | <b>Description</b>                                                                          |
|-------------------------|-----------------------------------------|-------------------------------------|---------------------------------|---------------------------------------------------------------------------------------------|
| <b>Willow tree soil</b> | <b>Colney sport fields (Colney, UK)</b> | <b>52°37'17.2"N<br/>1°13'46.3"E</b> | April 2015 and <b>July 2015</b> | <b>Used for enrichment and isolation of isoprene degraders, and for DNA-SIP experiments</b> |
| Willow tree soil        | UEA broad (Norwich, UK)                 | 52°37'06.6"N<br>1°14'09.9"E         | June 2016                       | Used for enrichment and targeted isolation of isoprene degraders                            |
| Willow tree leaves      | UEA broad (Norwich, UK)                 | 52°37'06.6"N<br>1°14'09.9"E         | September 2015 and October 2016 | Used for enrichment and isolation of epiphytic isoprene-degraders                           |
| Oil palm tree soil      | Kew Gardens Palm House (London, UK)     | 51°28'43.6"N<br>0°17'33.1"W         | November 2016 and February 2017 | Used for enrichment and isolation of isoprene degraders                                     |
| Oil palm tree leaves    | Kew Gardens Palm House (London, UK)     | 51°28'43.6"N<br>0°17'33.1"W         | November 2016 and February 2017 | Used for enrichment and isolation of epiphytic isoprene-degraders                           |

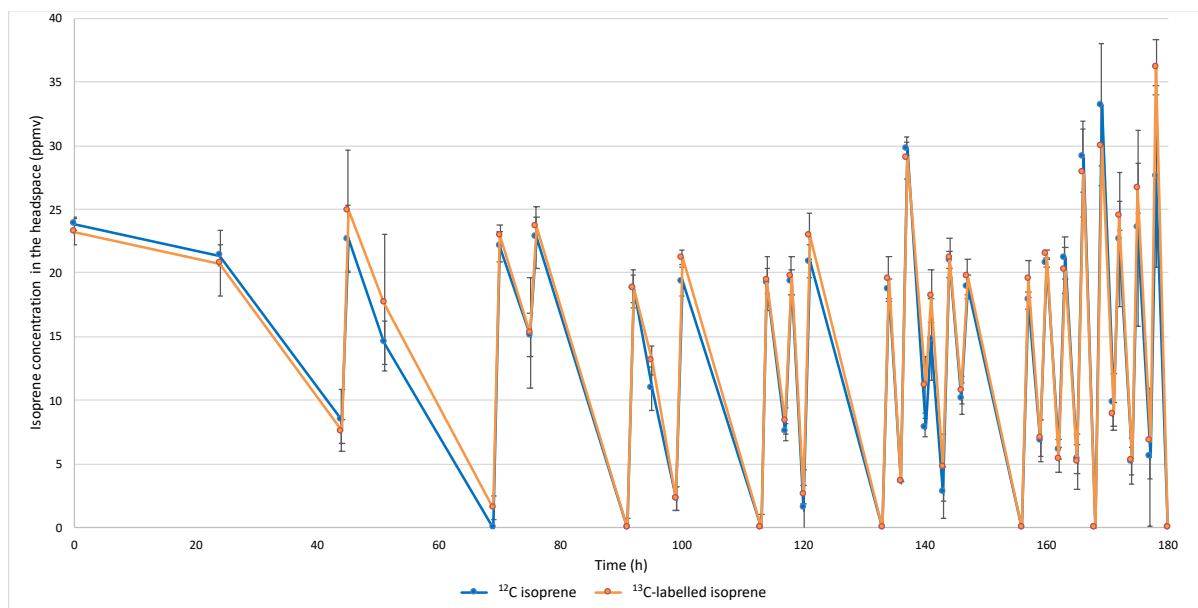

**Figure S1. Isoprene consumption in microcosms used in DNA-SIP experiments with willow soil.**

Microcosms were enriched with  $^{12}\text{C}$ - or  $^{13}\text{C}$ -labelled isoprene. Data points show the mean of triplicates and error bars show the standard deviation.

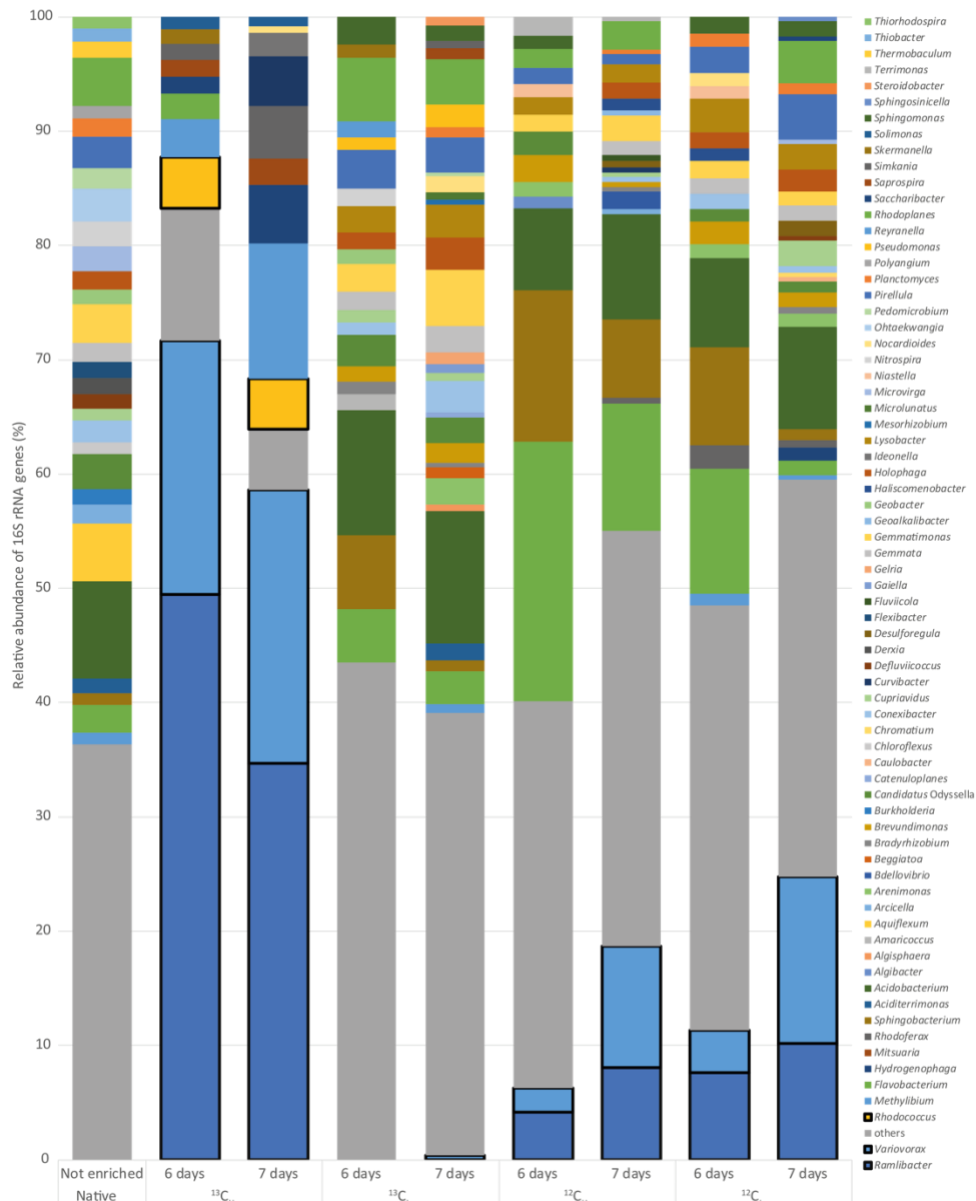

**Figure S2. Relative abundance of 16S rRNA genes at the genus level in DNA isolated after DNA-SIP enrichments**

The abundance of bacterial 16S rRNA genes retrieved by PCR from un-enriched (unfractionated DNA) is shown on the left. Subsequent bars describe the abundance of 16S rRNA genes retrieved from DNA-SIP experiments with isoprene-enriched willow soil samples after 6 and 7 days of enrichment with  $^{12}\text{C}$ - and  $^{13}\text{C}$ -labelled isoprene. DNA fractions arising after fractionation from willow soil samples enriched with  $^{13}\text{C}$ -isoprene and  $^{12}\text{C}$ -isoprene are designated heavy (H) and light (L), refer to Figure S5 and S6. Taxonomic affiliation of 16S rRNA genes is reported at the genus level. Only 16S rRNA gene sequences with a relative abundance of greater than 1% are shown. 16S rRNA gene sequences with a relative abundance of less than 1% are grouped together as “others”. Genera (*Ramlibacter*, *Variovorax* and *Rhodococcus*) identified in these DNA-SIP experiments as putative isoprene-degrading bacteria according to  $^{13}\text{C}$ -labelling, are highlighted with a black border

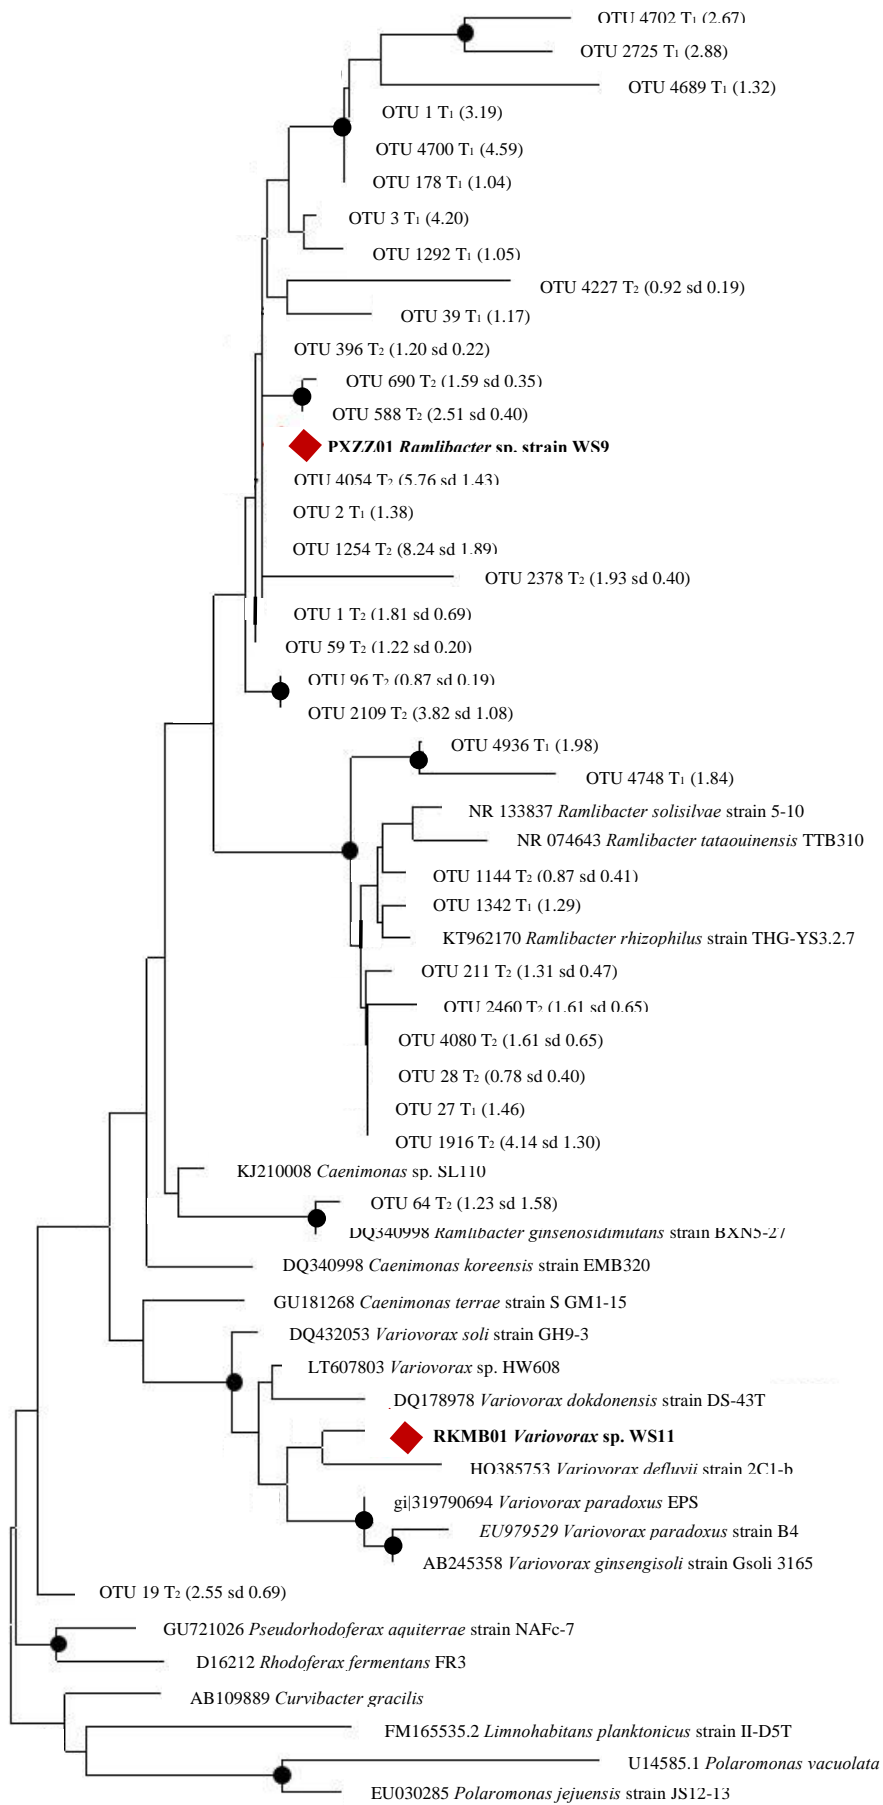

0.02



**Figure S3. 16S rRNA gene comparisons with newly isolated isoprene-degraders and 16S rRNA genes retrieved in DNA-SIP experiments.**

Neighbour-joining phylogenetic tree with partial 16S rRNA gene sequences from representative members of the Comamonadaceae family, strains isolated in this study and the most abundant 16S rRNA gene sequence OTUs (>1% abundance) obtained from the willow soil DNA-SIP experiment. OTU sequences are differentiated between sequences obtained after 6 days (T<sub>1</sub>) and 7 days of enrichment (T<sub>2</sub>). OTU designations, for timepoint 2, include the average relative abundance (%) and standard deviation values in parentheses. 55 16S rRNA gene sequences were included in the analysis, with a total of 251 nucleotides used in the final dataset. Bootstrap values (1000 replications,[56]) over 75% are shown as solid circles in the nodes. Isoprene-degrading strains isolated in this study are indicated in bold and with a red diamond. The scale bar shows nucleotide substitutions per site.

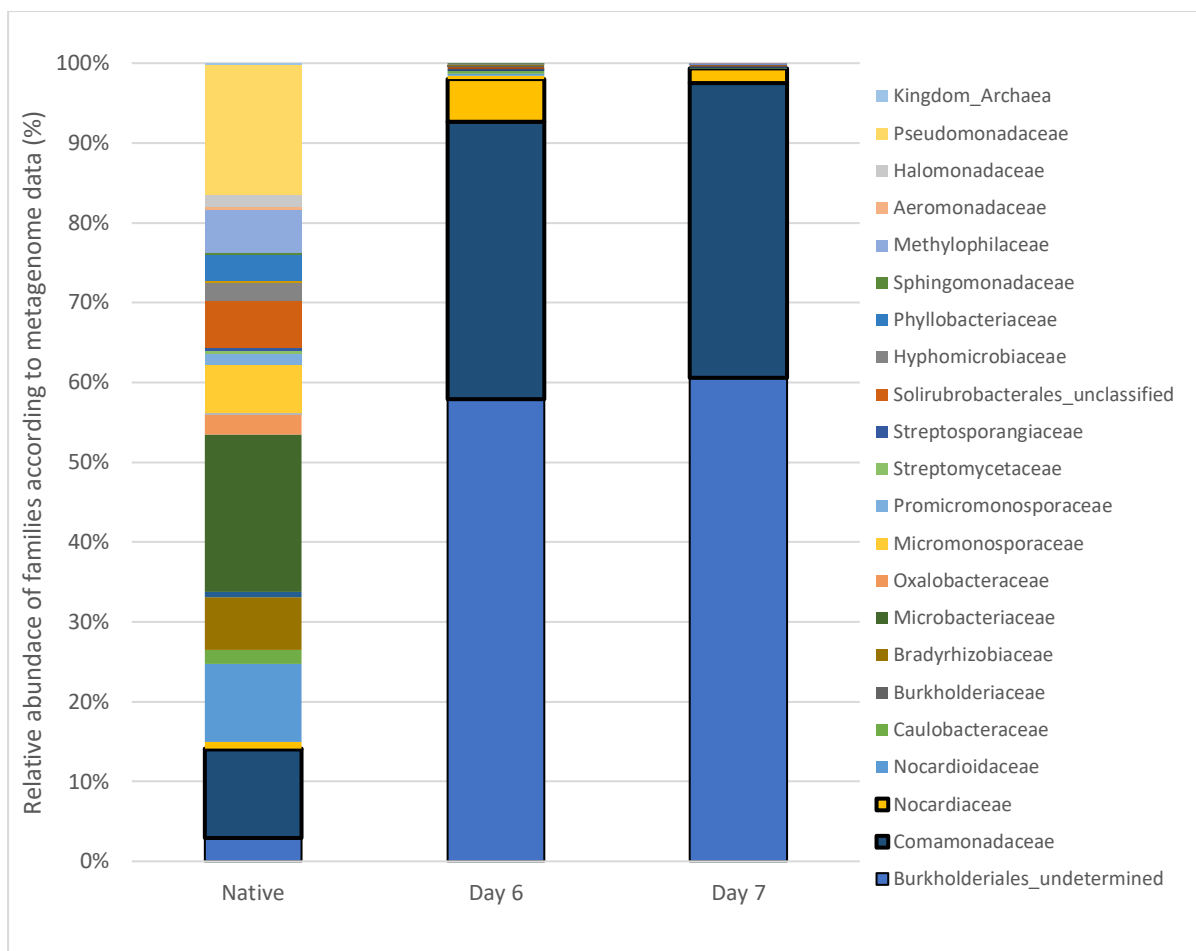

**Figure S4. Metagenome analysis of  $^{13}\text{C}$ -DNA at the family level obtained after DNA-SIP experiments.**

Phylogenetic abundance obtained from un-enriched (unfractionated DNA) and  $^{13}\text{C}$ -enriched DNA obtained from willow soil samples in DNA-SIP experiments after 6 and 7 days of enrichment with  $^{13}\text{C}$ -labelled isoprene. Analysis was done using Metaphlan software using trimmed unassembled metagenome reads and the taxonomic affiliation is shown at the family level. Sequences identified as from putative isoprene-degrading bacteria, (according to  $^{13}\text{C}$ -labelling) are indicated with a black border

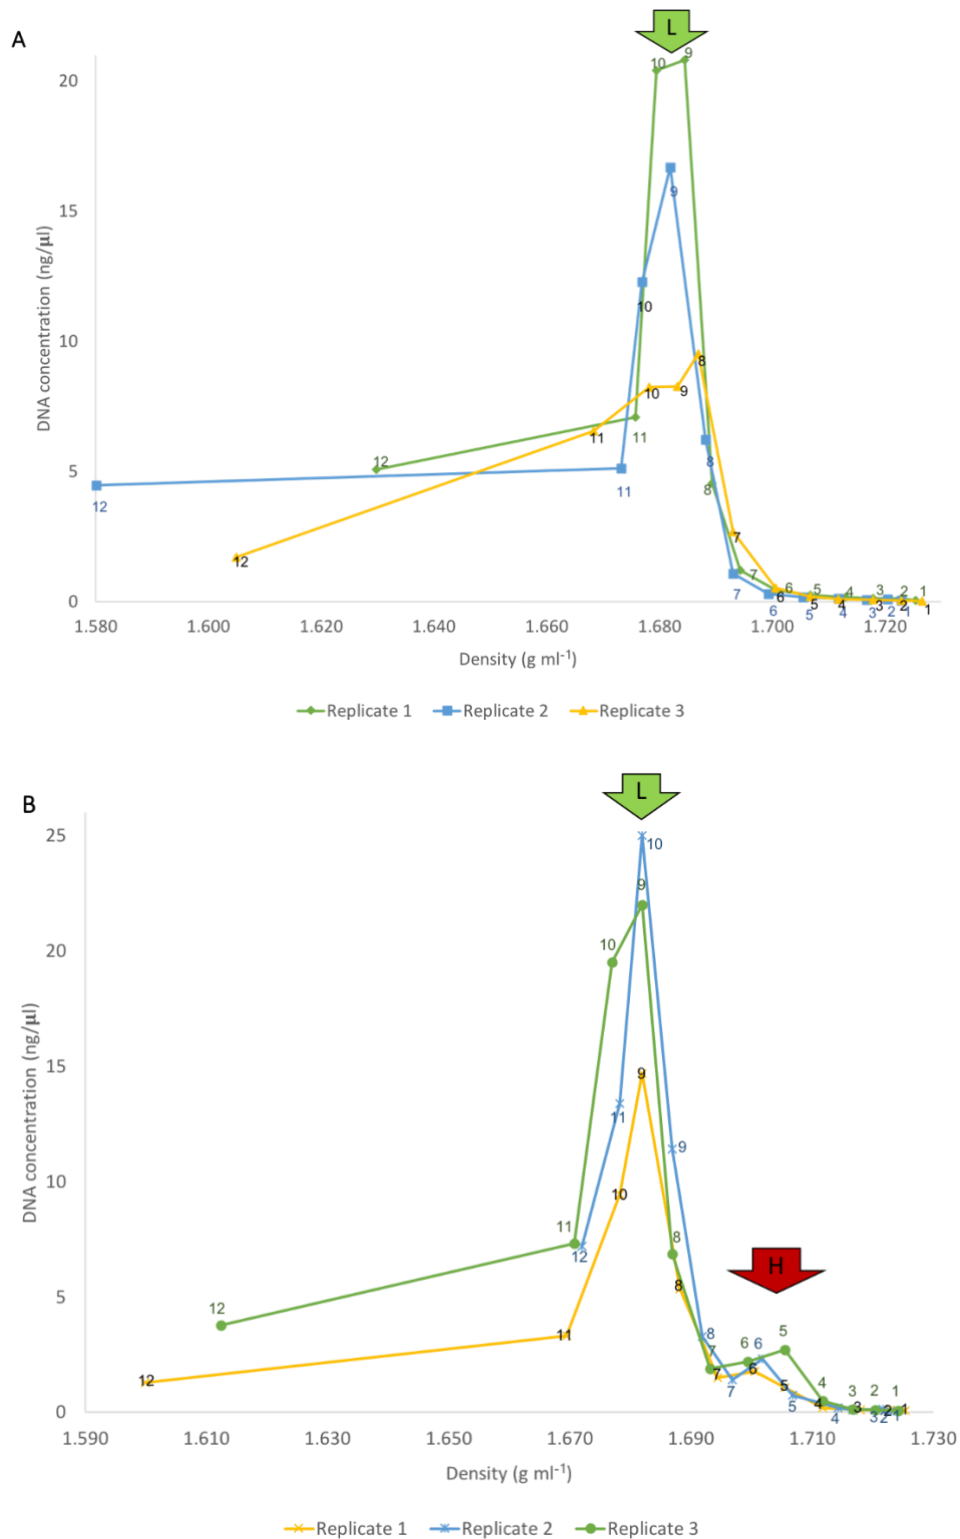

**Figure S5. Separation of DNA after DNA-SIP experiments (6-day incubation).** DNA concentration and density of CsCl fractions obtained after ultracentrifugation of extracted DNA from enriched microcosms after 6 days of enrichment with A) <sup>12</sup>C-isoprene and B) <sup>13</sup>C-labelled isoprene. The CsCl fractions chosen to represent <sup>13</sup>C-labelled (heavy fraction) and unlabelled <sup>12</sup>C-DNA (light fraction) are indicated: H arrow: heavy DNA; L arrow: light DNA.

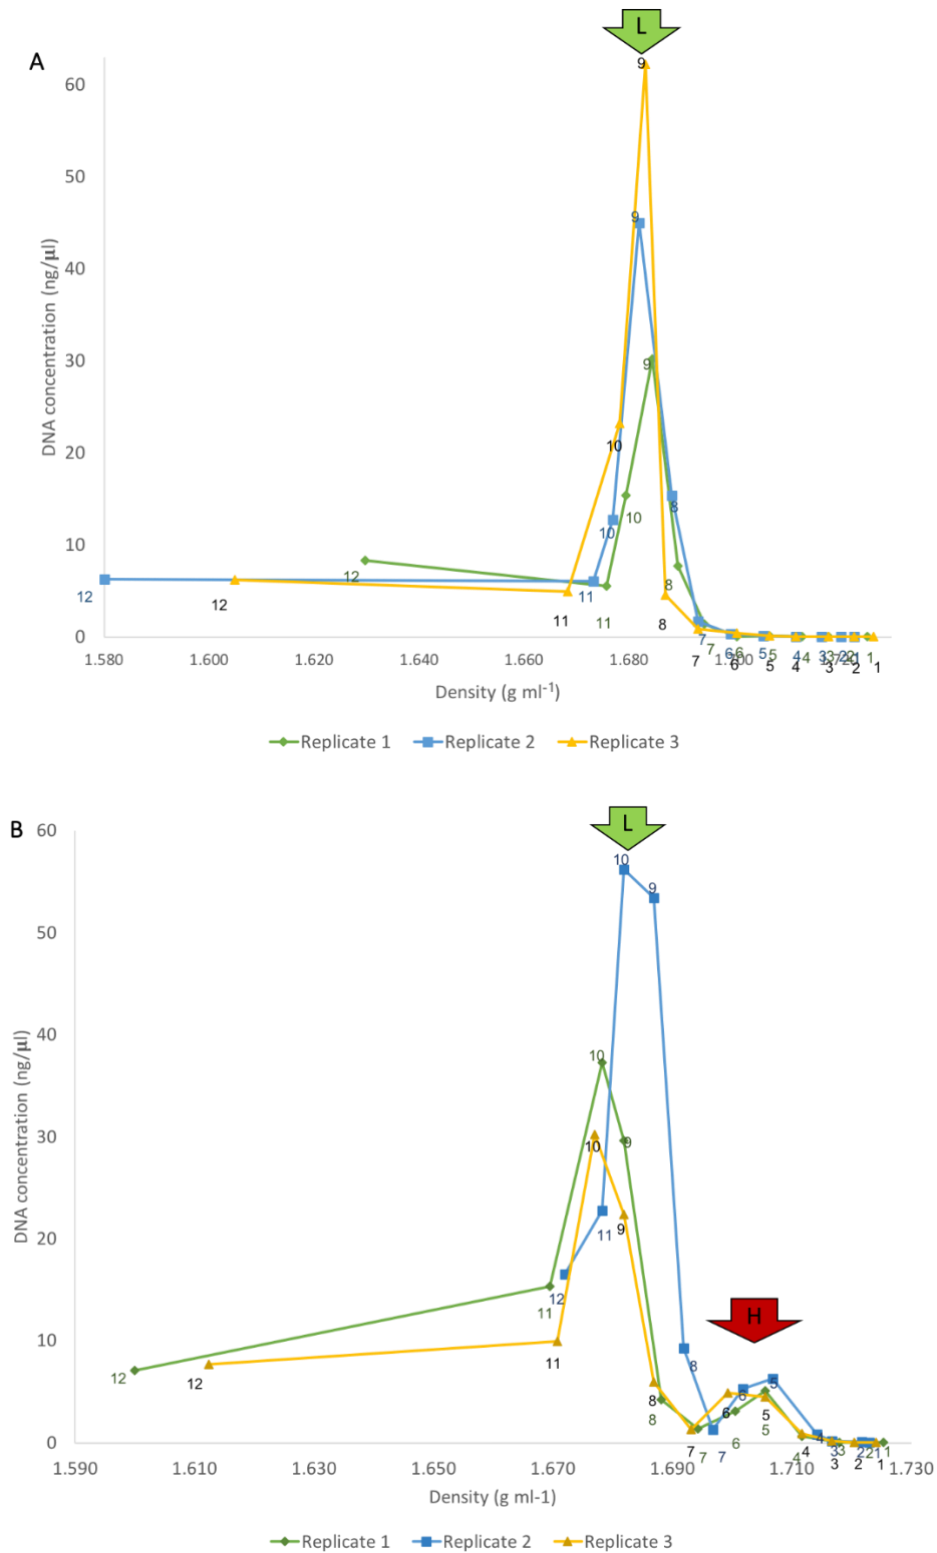

**Figure S6. Separation of DNA after DNA-SIP experiments (7-day incubation).** DNA concentration and density of CsCl fractions obtained after ultracentrifugation of extracted DNA from enriched microcosms after 7 days of enrichment with A) <sup>12</sup>C-isoprene and B) <sup>13</sup>C-labelled isoprene. The CsCl fractions chosen to represent <sup>13</sup>C-labelled (heavy fraction) and unlabelled <sup>12</sup>C-DNA (light fraction) are indicated: H arrow: heavy DNA; L arrow: light DNA

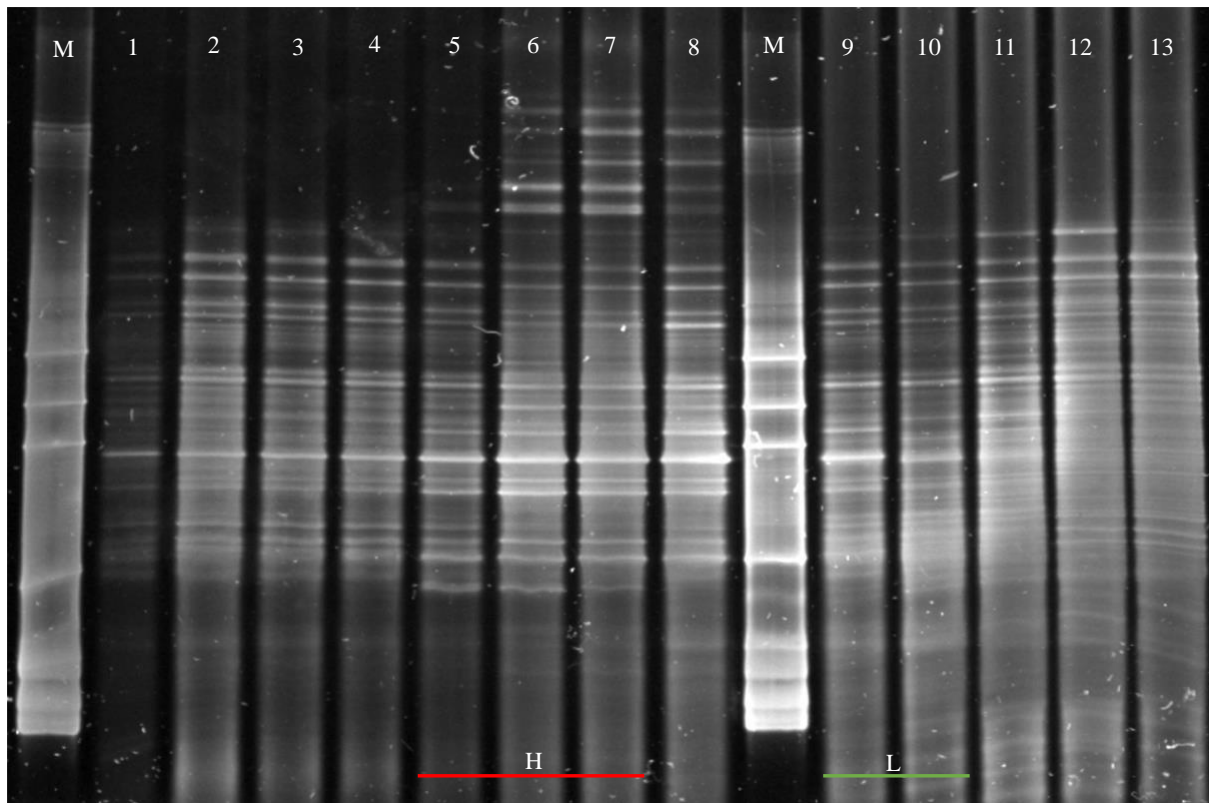

**Figure S7.**

**Representative denaturing gradient gel electrophoresis (DGGE) gel of CsCl fractions 1 to 13 after ultracentrifugation of extracted DNA from enriched microcosms after 6 days incubation with  $^{13}\text{C}$ -labelled isoprene.** Each fraction number is shown on the top, along with the DGGE marker ladder (M). Samples that were considered light (L) and heavy (H) are shown with a green and red line below, respectively.

Reference:

- Crombie, A. T., Khawand, M. El, Rhodius, V. A., Fengler, K. A., Miller, M. C., Whited, G. M., et al. (2015). Regulation of plasmid-encoded isoprene metabolism in *Rhodococcus*, a representative of an important link in the global isoprene cycle. *Environ. Microbiol.* 17, 3314–3329. doi:10.1111/1462-2920.12793.
- Rodriguez-R, L. M., Gunturu, S., Harvey, W. T., Rosselló-Mora, R., Tiedje, J. M., Cole, J. R., et al. (2018). The Microbial Genomes Atlas (MiGA) webserver: taxonomic and gene diversity analysis of Archaea and Bacteria at the whole genome level. *Nucleic Acids Res.* 46, W282–W288. doi:10.1093/nar/gky467.
